# Dietary Fat Influences the Expression of Contractile and Metabolic Genes in Rat Skeletal Muscle

Wataru Mizunoya<sup>1\*</sup>, Yohei Iwamoto<sup>1</sup>, Bungo Shirouchi<sup>2</sup>, Masao Sato<sup>2</sup>, Yusuke Komiya<sup>1</sup>, Farzaneh Rahimi Razin<sup>1</sup>, Ryuichi Tatsumi<sup>1</sup>, Yusuke Sato<sup>1†</sup>, Mako Nakamura<sup>1</sup>, Yoshihide Ikeuchi<sup>1</sup>

**1** Department of Bioresource Sciences, Graduate School of Agriculture, Kyushu University, Fukuoka, Japan, **2** Department of Bioscience and Biotechnology, Graduate School of Agriculture, Kyushu University, Fukuoka, Japan

## Abstract

Dietary fat plays a major role in obesity, lipid metabolism, and cardiovascular diseases. To determine whether the intake of different types of dietary fats affect the muscle fiber types that govern the metabolic and contractile properties of the skeletal muscle, we fed male Wistar rats with a 15% fat diet derived from different fat sources. Diets composed of soybean oil (n-6 polyunsaturated fatty acids (PUFA)-rich), fish oil (n-3 PUFA-rich), or lard (low in PUFAs) were administered to the rats for 4 weeks. Myosin heavy chain (MyHC) isoforms were used as biomarkers to delineate the skeletal muscle fiber types. Compared with soybean oil intake, fish oil intake showed significantly lower levels of the fast-type MyHC2B and higher levels of the intermediate-type MyHC2X composition in the extensor digitorum longus (EDL) muscle, which is a fast-type dominant muscle. Concomitantly, MyHC2X mRNA levels in fish oil-fed rats were significantly higher than those observed in the soybean oil-fed rats. The MyHC isoform composition in the lard-fed rats was an intermediate between that of the fish oil and soybean oil-fed rats. Mitochondrial uncoupling protein 3, pyruvate dehydrogenase kinase 4, and porin mRNA showed significantly upregulated levels in the EDL of fish oil-fed rats compared to those observed in soybean oil-fed and lard-fed rats, implying an activation of oxidative metabolism. In contrast, no changes in the composition of MyHC isoforms was observed in the soleus muscle, which is a slow-type dominant muscle. Fatty acid composition in the serum and the muscle was significantly influenced by the type of dietary fat consumed. In conclusion, dietary fat affects the expression of genes related to the contractile and metabolic properties in the fast-type dominant skeletal muscle, where the activation of oxidative metabolism is more pronounced after fish oil intake than that after soybean oil intake.

**Citation:** Mizunoya W, Iwamoto Y, Shirouchi B, Sato M, Komiya Y, et al. (2013) Dietary Fat Influences the Expression of Contractile and Metabolic Genes in Rat Skeletal Muscle. PLoS ONE 8(11): e80152. doi:10.1371/journal.pone.0080152

**Editor:** Atsushi Asakura, University of Minnesota Medical School, United States of America

**Received:** July 24, 2013; **Accepted:** September 30, 2013; **Published:** November 11, 2013

**Copyright:** © 2013 Mizunoya et al. This is an open-access article distributed under the terms of the Creative Commons Attribution License, which permits unrestricted use, distribution, and reproduction in any medium, provided the original author and source are credited.

**Funding:** This research was supported by Grant-in-Aid for Young Scientists (B) (#18780096), Grant-in-Aid for Scientific Research (C) (#22580136) from Japan Society for Promotion of Science, and the research grant from the Uehara Memorial Foundation. The costs of publication were supported in part by a Research Grant for Young Investigators of the Faculty of Agriculture, Kyushu University. The funders had no role in study design, data collection and analysis, decision to publish, or preparation of the manuscript.

**Competing interests:** The authors have declared that no competing interests exist.

\* E-mail: wataru\_m@agr.kyushu-u.ac.jp

† Current address: Department of Animal Science, Utsunomiya University, Utsunomiya, Japan

## Introduction

Skeletal muscle is the largest organ in the human body and comprises approximately 40% of body weight. In the skeletal muscle of most animals, there are two major fiber types: type 1 fibers (slow-twitch oxidative, red muscle) and type 2 fibers (fast-twitch glycolytic, white muscle). Type 1 fibers are rich in mitochondria, possess high oxidative capacity, and are resistant to fatigue. Muscles enriched in type 1 fibers, such as the soleus, perform sustained and tonic contractile activities, like postural tension. Conversely, type 2 muscle fibers exhibit high glycolytic metabolism and fatigue easily. Muscles enriched in type 2 fibers, such as the extensor digitorum longus (EDL), are typically involved in intense and rapid activities of short

duration. Fiber type composition varies greatly between individuals, resulting in differences in exercise performance, fatigue resistance, and metabolic capacity in humans [1]. Studies in animal models have also demonstrated a strong relationship between muscle fiber type and the development of diabetes and obesity [2,3].

Skeletal muscle fiber types are generally classified according to myosin heavy chain (MyHC) isoforms. In adult rodent skeletal muscles, four MyHC isoforms have been identified: MyHC1, 2A, 2X, and 2B [4]. MyHC1 is expressed in type 1 muscle fibers. Type 2 fibers are further subdivided into type 2A, 2X, and 2B muscle fibers, in which MyHC2A, 2X, and 2B are preferentially expressed, respectively. Type 2A and 2X fibers have intermediate characteristics between type 1 and type 2B

fibers. Although type 2X fibers are sometimes defined as fast-twitch glycolytic fibers, type 2B fibers have an even stronger fast-twitch glycolytic phenotype than type 2X fibers [5–7].

The muscle fiber type in adult muscles can switch in response to hormonal status (particularly that of thyroid hormones) [8] or activation/contraction patterns, e.g., external electrical stimulation [9], paralysis due to spinal cord injury [10], denervation [11], cross-reinnervation (fast muscle reinnervated by a slow nerve and vice versa) [12], mechanical unloading [13], and food components [14]. Endurance training is also a well-known stimulus that induces fast-to-slow fiber type transition [15].

The fatty acid profiles of fat derived from plants, animals, and fish are unique. The dietary fats of plant origin are rich in either n-6 polyunsaturated fatty acids (PUFA) (soybean oil) or n-3 PUFA (flaxseed oil), of animal origin are rich in saturated fatty acids (lard), and of fish origin are rich in n-3 PUFA (fish oil). To date, different types of dietary fat has been shown to alter numerous processes involved in the regulation of energy metabolism. Fish oil containing high n-3 PUFA, including eicosapentaenoic acid (EPA) and docosahexaenoic acid (DHA) have been reported to improve lipid metabolism. In humans, the oxidation of lipids is increased by the consumption of dietary fish oil [16], which suggests that n-3 PUFA can reduce adiposity. The anti-obesity effect of n-3 PUFA reflects the metabolic changes in several tissues, such as stimulation of lipid oxidation and inhibition of lipogenesis in the liver [17,18], stimulation of fatty acid oxidation in the muscle [19], and adaptive thermogenesis mediated by mitochondrial uncoupling protein 1 (UCP1) in brown fat [20,21]. Dietary vegetable oils enriched in n-6 PUFA, such as linoleic acid are reported to lower serum cholesterol levels [22], although the increases in the ratio of n-6/n-3 PUFA, characteristic of the Western diet, could potentiate inflammatory processes and consequently predispose to or exacerbate many inflammatory diseases [23].

Since the composition of the muscle fiber types closely reflects its metabolic property, it is important to determine whether the muscle fiber types are affected by different types of dietary fat. If this were indeed the case, a diet composition that enhances aerobic metabolism would result in higher numbers of slow or intermediate-type fibers. In this study, we examined whether different dietary fat sources—soybean oil (n-6 PUFA-rich), fish oil (n-3 PUFA-rich), or lard (low in PUFAs)—could affect the composition and metabolism-related genes in skeletal muscle fibers in both slow-type dominant (soleus) and fast-type dominant (EDL) muscle tissues. In addition, we measured the expression levels of transcription factors that regulate the muscle fiber types in these muscle tissues.

## Materials and Methods

### Animals and diets

Male Wistar rats (7 weeks old) weighing 210–230 g were purchased from a commercial supplier (Kyudo, Tosu, Japan). The rats were individually housed in stainless-steel wire-mesh cages in an animal room at  $22 \pm 2^\circ\text{C}$  at  $50 \pm 10\%$  humidity under an artificial lighting system of 12-h light and 12-h darkness (lights on from 0800 to 2000) and were fed a

**Table 1.** The composition of experimental diets (g/kg).

| Ingredient               | Soybean oil diet | Fish oil diet | Lard diet |
|--------------------------|------------------|---------------|-----------|
| $\alpha$ -Corn starch    | 387.2            | 387.2         | 387.2     |
| Sucrose                  | 120.5            | 120.5         | 120.5     |
| Casein                   | 241.0            | 241.0         | 241.0     |
| Soybean oil              | 150.0            | -             | -         |
| Fish oil                 | -                | 150.0         | -         |
| Lard                     | -                | -             | 150.0     |
| Cellulose powder         | 50.0             | 50.0          | 50.0      |
| Mineral mix (AIN-93G-MX) | 35.0             | 35.0          | 35.0      |
| Vitamin mix (AIN-93-VX)  | 10.0             | 10.0          | 10.0      |
| L-Cystine                | 3.6              | 3.6           | 3.6       |
| Choline bitartrate       | 2.5              | 2.5           | 2.5       |
| tert-Butylhydroquinone   | 0.14             | 0.14          | 0.14      |

doi: 10.1371/journal.pone.0080152.t001

commercial diet (Type CRF-1 of Oriental Yeast Co., Tokyo, Japan) ad libitum for 1 week to acclimatize them to the environment. Following the acclimatization period, rats were divided into three groups (soybean oil-, fish oil-, and lard-fed groups,  $n = 6$  each) so that each respective group had the same initial body weight and average food intake during the acclimatization period. All diets were prepared based on a modified AIN-93G composition containing 15% (w/w) soybean oil, lard, or fish oil; the detailed diet compositions are shown in Table 1. The diets were prepared as pellets by Oriental Yeast Co. Ltd., Japan, then sealed, light-shielded, and stored at  $4^\circ\text{C}$  until use. Table 2 shows the fatty acid compositions of the soybean oil, lard, and fish oil. Each rat was given a fresh diet every day for 4 weeks by pair-feeding. Food intake and body weight were measured daily. The animals were allowed free access to water during the entire experimental period. All experimental procedures were performed according to the Guidelines for Animal Experiments for the Faculty of Agriculture and the Graduate Course of Kyushu University and the law [No.105] and notification [No.1] of the Japanese Government, and with the ethical approval of Animal Care and Use Committee, Kyushu University (protocol 05-002-01).

### Tissue and blood sampling

After the treatment period, the rats were anesthetized via intraperitoneal injection of pentobarbital sodium (50 mg/kg body weight) and sacrificed by decapitation. Blood was rapidly collected from the neck. Sera were collected from the blood and kept at  $-80^\circ\text{C}$  until use for assays. Serum concentrations of glucose (Glucose-CR11, Wako Pure Chemical Industries, Osaka, Japan), free fatty acids (FFA) (NEFA C Test Wako, Wako Pure Chemical Industries), triglycerides (Triglyceride E Test Wako, Wako Pure Chemical Industries), and ketone bodies (Ketone Test A and B, Sanwa Chemical Institute, Nagoya, Japan) were measured using commercial kits. The EDL, soleus, tibialis anterior, plantaris, and gastrocnemius muscles; epididymal, perirenal, and mesenteric fat; brown adipose tissue; and liver, heart, and kidneys were removed and

**Table 2.** The fatty acid composition of the dietary fats in experimental diets (%).

|         | Fatty acid               | Soybean oil | Fish oil | Lard  |
|---------|--------------------------|-------------|----------|-------|
| 12:0    | lauric acid              | -           | 0.07     | 2.83  |
| 14:0    | myristic acid            | 5.55        | 8.13     | 2.58  |
| 15:0    | pentadecylic acid        | -           | 2.20     | -     |
| 16:0    | palmitic acid            | 5.66        | 15.94    | 25.07 |
| 16:1    | palmitoleic acid         | -           | 9.89     | 2.38  |
| 17:0    | margaric acid            | -           | 2.51     | -     |
| 18:0    | stearic acid             | 10.61       | 3.01     | 7.31  |
| 18:1    | oleic acid               | 20.66       | 11.47    | 46.42 |
| 18:2n-6 | linoleic acid            | 50.42       | 0.86     | 10.06 |
| 18:3n-3 | $\alpha$ -linolenic acid | 5.18        | 0.57     | 0.71  |
| 20:1    | gadoleic acid            | -           | 0.71     | -     |
| 20:4n-6 | arachidonic acid         | -           | 0.96     | 0.38  |
| 20:5n-3 | eicosapentaenoic acid    | -           | 20.18    | -     |
| 22:5n-3 | docosapentaenoic acid    | -           | 2.17     | -     |
| 22:6n-3 | docosahexaenoic acid     | -           | 8.11     | -     |
|         | other fatty acids        | 1.92        | 13.21    | 2.26  |
|         | SFA                      | 21.8        | 31.9     | 37.8  |
|         | MUFA                     | 20.7        | 22.1     | 48.8  |
|         | PUFA                     | 55.6        | 32.9     | 11.2  |
|         | n-6/n-3                  | 9.7         | 0.1      | 14.8  |

SFA; saturated fatty acid, MUFA; monounsaturated fatty acid, PUFA; polyunsaturated fatty acid

doi: 10.1371/journal.pone.0080152.t002

weighed. The EDL and soleus muscles were rapidly frozen in liquid nitrogen and stored at  $-80^{\circ}\text{C}$  until analysis.

### Preparation of protein and RNA samples

EDL and soleus muscles were ground to a powder with a mortar and pestle cooled with liquid nitrogen. For the protein assay, weighed, frozen, powdered muscles (approx. 50 mg) were homogenized with a motor-driven small pestle in an SDS solution containing 10% SDS, 40 mM DTT, 5 mM EDTA, and 0.1 M Tris-HCl buffer (pH 8.0), in which Protease Inhibitor Cocktail for Use with Mammalian Cell and Tissue Extracts (Nacalai Tesque, Inc., Kyoto, Japan) was added at 1:100. The sample homogenates were heated in boiling water for 3 min. Total protein concentrations were assayed using BCA Protein Assay Reagent (Pierce), with bovine serum albumin as a standard. The samples were diluted in  $2 \times$  sample buffer (100 mM DTT, 4.0% SDS, 0.16 M Tris-HCl (pH 6.8), 43% glycerol, and 0.2% bromophenol blue) and  $\text{dH}_2\text{O}$  to give final protein concentrations of 10  $\text{ng}/\mu\text{L}$  (myosin heavy chain isoform assay) or 8  $\mu\text{g}/\mu\text{L}$  (Western blotting) in  $1 \times$  sample buffer. For the mRNA assay, total RNA was isolated from powdered EDL and soleus muscles (approx. 50 mg) using TRIzol Reagent (Invitrogen) according to the manufacturer's protocol. Briefly, muscle tissue was homogenized in 1 mL TRIzol Reagent using a Polytron homogenizer. Cooled chloroform was added and separated by centrifugation. The aqueous phase containing RNA was transferred to a clean tube, and the RNA was precipitated by adding isopropanol and incubating at room

temperature for 10 min. After another centrifugation, the RNA pellet was washed with 75% ethanol and finally dissolved in 20  $\mu\text{L}$  of diethylpyrocarbonate-treated water. The RNA concentration was determined spectrophotometrically, and 0.6  $\mu\text{g}$  of total RNA was reverse transcribed by a reverse-transcriptase SuperScript III (Invitrogen) using Oligo d(T)16 primer (Applied Biosystems, Carlsbad, CA, USA). The protein and reverse-transcribed cDNA samples were stored at  $-80^{\circ}\text{C}$  until use for assays.

### Analysis of MyHC isoform composition

EDL and soleus protein samples were subjected to high-resolution SDS-polyacrylamide gel electrophoresis for the assessment of MyHC isoform content as described in detail by Mizunoya et al. [24]. Briefly, the gel was composed of 8% acrylamide (the acrylamide/Bis ratio was 99:1) and contained 35% (v/v) glycerol. After samples (50 ng) were loaded, electrophoresis was performed at a constant voltage of 140 V for 22 h at  $4^{\circ}\text{C}$ . Gels were stained with Silver Stain Kanto III (Kanto Chemical Co. Inc., Tokyo, Japan) and dried. The bands were captured on an image scanner, and the relative content of MyHC isoforms was quantified by densitometry using ImageJ 1.34s software (Rasband W, National Institutes of Health, USA). MyHC isoforms were identified according to their different migration rates (MyHC1 > 2B > 2X > 2A).

### Real-time quantitative RT-PCR

Real-time quantitative PCR using Roche LightCycler1.5 was performed under the TaqMan probe detection format and standardized according to  $\beta$ -actin expression. All primers and appropriate probes were designed and chosen by ProbeFinder (version 2.35 for rat, Roche) with an intron-spanning assay, with the exception of mitochondrially encoded cytochrome c oxidase 2 (MTCO2) and myogenic differentiation 1 (MyoD). The primer sets and the Universal Probe Library TaqMan probes (Roche) for these genes are listed in Table 3. Threshold cycles (Ct) were determined as the PCR cycle at which an increase in fluorescence above a baseline signal was first detected. The annealing temperature was set to  $60^{\circ}\text{C}$  in all cases. Transcript levels of genes related to (i) energy metabolism (myoglobin, lipoprotein lipase (LPL), UCP3, and pyruvate dehydrogenase kinase 4 (PDK4)); (ii) mitochondrial proteins (porin, MTCO2, UCP3, and PDK4); and (iii) transcription factors (peroxisome proliferator-activated receptor  $\delta$  (PPAR $\delta$ ), forkhead box O1 (FOXO1), MyoD, and myogenin), and a coactivator (PGC1 $\alpha$ ) for muscle fiber type regulation were analyzed. Genes were analyzed by using a standard curve constructed from a serial dilution of cDNA aliquots pooled from one randomly chosen sample. To clarify differences in the four MyHC isoform amounts within the same muscle, the MyHC isoforms were analyzed using the  $\Delta\text{Ct}$  method [25] to compare the expression relative to  $\beta$ -actin expression. For other genes, values were standardized to the  $\beta$ -actin expression level and expressed as the fold-change in gene expression relative to the soybean oil-fed group.

**Table 3.** Primer/probe sets used for real-time quantitative PCR.

| mRNA           |         | Sequence (5'-3')          | Probe # <sup>1</sup> | Amplicon (nt)   | Access no.   |
|----------------|---------|---------------------------|----------------------|-----------------|--------------|
| MyHC1          | Forward | GAGGAGAGGGCGGACATT        | 95                   | 88              | NM_017240    |
|                | Reverse | ACTCTTCATTCAGGCCCTTG      |                      |                 |              |
| MyHC2A         | Forward | AAATCTTACAAGAGACAAGCTGAGG | 73                   | 67              | NM_001135157 |
|                | Reverse | TGCGGAACCTGGATAGATTG      |                      |                 |              |
| MyHC2X         | Forward | CCTGCAGCTCCAAGTTCAGT      | 112                  | 69              | NM_001135158 |
|                | Reverse | ATCAGCTGGTCGCATCTTTC      |                      |                 |              |
| MyHC2B         | Forward | TGCCTCTTCTTCATCTGGT       | 46                   | 111             | NM_019325    |
|                | Reverse | AGCAGCCTCCCCAAAAAC        |                      |                 |              |
| myoglobin      | Forward | GGGACAAACATGCTGCTGAG      | 110                  | 113             | NM_021588    |
|                | Reverse | TCTTCAGGACTTGGATGATGAC    |                      |                 |              |
| LPL            | Forward | CAGAGAAGGGGCTTGAGA        | 58                   | 85              | NM_012598    |
|                | Reverse | TTCAGCAGGGAGTCAATGAA      |                      |                 |              |
| UCP3           | Forward | CCCCTACACTGTATGCTGAGG     | 79                   | 77              | NM_013167    |
|                | Reverse | AGAAAGGAGGGCATGAATCC      |                      |                 |              |
| PDK4           | Forward | GAGCTGTTCTCCCGCTACAG      | 120                  | 84              | NM_053551    |
|                | Reverse | AGTTCTCTCACAGGCATTTTCTG   |                      |                 |              |
| porin          | Forward | TTTTCGCCAAAGTGAACA        | 120                  | 118             | NM_031353    |
|                | Reverse | CACCCGATTGACGTTCT         |                      |                 |              |
| MTCO2          | Forward | GACGCCAAGAAGTAGAAACAA     | 14                   | 72 <sup>2</sup> | N/A          |
|                | Reverse | GGAGGGAAGGGCAATTAGAA      |                      |                 |              |
| PPAR $\delta$  | Forward | TCGAGTTTGCTGTCAAGTTCA     | 50                   | 127             | NM_013141    |
|                | Reverse | TGGATGGCTTCCACCTGT        |                      |                 |              |
| PGC1 $\alpha$  | Forward | GAAGCGGGAGTCTGAAAGG       | 29                   | 76              | NM_031347    |
|                | Reverse | GTAAATCACACGGCGCTCTT      |                      |                 |              |
| FOXO1          | Forward | TCAGGCTAGGAGTTAGTGAGCA    | 68                   | 95              | NM_001191846 |
|                | Reverse | GGGGTGAAGGCATCTTT         |                      |                 |              |
| MyoD           | Forward | CCCTGTTGTTTGTGGAGACA      | 50                   | 69 <sup>2</sup> | NM_176079    |
|                | Reverse | CTGTGGAAAGAGTGGGTGT       |                      |                 |              |
| myogenin       | Forward | CCTTGCTCAGCTCCCTCA        | 63                   | 94              | NM_017115    |
|                | Reverse | TGGGAGTTGCATTCCTGG        |                      |                 |              |
| $\beta$ -actin | Forward | CTGGCTCCTAGCACCATGA       | 63                   | 76              | NM_031144    |
|                | Reverse | TAGAGCCACCAATCCACACA      |                      |                 |              |

1. Universal Probe Library probe number (Roche Applied Science)

2. Not intron-spanning

MyHC, myosin heavy chain; LPL, lipoprotein lipase; UCP3, uncoupling protein 3; PDK4, pyruvate dehydrogenase kinase 4; MTCO2, mitochondrially encoded cytochrome c oxidase 2; PGC1 $\alpha$ , peroxisome proliferator-activated receptor gamma coactivator 1 $\alpha$ ; FOXO1, forkhead box O1; PPAR $\delta$ , peroxisome proliferator-activated receptor  $\delta$ ; MyoD, myogenic differentiation 1.

doi: 10.1371/journal.pone.0080152.t003

### Western blot analysis

For the Western blot analysis, EDL and soleus proteins (40  $\mu$ g) were loaded onto 12% polyacrylamide gels, subjected to electrophoresis, and transferred to Hybond ECL nitrocellulose membranes (GE Healthcare) for 4 h at 38 V (constant voltage). The membranes were blocked with 5% skim milk diluted in Tris-buffered saline containing 0.1% Tween 20 (TBS-T) for 45 min at room temperature. The blots were then incubated overnight at 4°C with gentle agitation in dilutions of primary antibodies. The following antibodies were used: mouse monoclonal anti-myoglobin (Sigma M7773, 1:1000); anti-pan-actin (Chemicon MAB1501 (clone C4), 1:3000000); anti-porin (Abcam ab14734, 1:4000000); rabbit polyclonal anti-UCP3 (Abcam ab3477, 1:20000); anti-PGC1 $\alpha$  (Calbiochem 516557,

1:10000); and rabbit monoclonal anti-FOXO1 (Epitomics 1874-1, 1:2000). The primary antibodies were diluted in Can Get Signal solution 1 (Toyobo). After washing three times in TBS-T for 10 min, the membranes were incubated for 1 h with horseradish peroxidase-conjugated rat anti-mouse IgG (Jackson ImmunoResearch 287695) or swine anti-rabbit IgG (Dako P0399) at a 1:5000 dilution with Can Get Signal solution 2 (Toyobo) and then washed three times in TBS-T for 10 min. The blots were developed via enhanced chemiluminescence (ECL Western Blotting Reagents, RPN2106, GE Healthcare) and Hyperfilm ECL (GE Healthcare). The optical densities of the bands were normalized to actin as a loading control.



### Analysis of fatty acid composition in serum and muscle

Lipids in the serum and gastrocnemius muscle were extracted by the method described by Folch et al. [26]. Gastrocnemius muscle was used because it represents a fast-dominant muscle that is made of mainly fast-type fibers and has sufficient mass for the experimental analysis. Methyl esterification of the extracted lipids was performed using a boron trifluoride methanol solution. The methyl-esterified fatty acid was subjected to a gas chromatography-flame ionization detector (GC-FID) system (GC-17, Shimadzu, Tokyo, Japan) equipped with a capillary column (Omegawax320, 30 m × 0.25 mm ID, Sigma-Aldrich Japan, Tokyo, Japan) and a Chromatopac integrator (C-R6A; Shimadzu) to analyze the fatty acid composition and relative ratios. The injection port and detector temperatures were 250°C. The column temperature was 200°C. Helium was used as the carrier gas at a flow rate of 65 cm/s. The fatty acid species was identified by comparison with the retention time of a fatty acid methyl ester (FAME) standard solution (Supelco 37 Component FAME Mix, Sigma-Aldrich Japan) and a single FAME, C20:3n-9 (Cayman Chemical, MI, USA). The relative content of the respective fatty acids was calculated from the GC-FID chromatogram.

### Statistical analysis

Data are expressed as the mean ± SE. Comparisons among the three experimental groups were performed by one-way ANOVA followed by a Tukey–Kramer multiple-comparison test, when appropriate. A value of  $p < 0.05$  was considered significant. Statistics were calculated with Excel-Toukei 2006 (Social Survey Research Information Co., Ltd., Tokyo, Japan).

## Results

### Body and organ weights

Growth parameters, such as body weight, food intake amount, skeletal muscle weights, and organ weights, for each experimental diet group are shown in Table 4. The final body weight and body weight gain were similar among the three groups. There was no significant difference in body weight throughout the four-week experimental period. However, food efficiency in the fish oil-fed rats was significantly higher than that in the lard-fed rats. Several skeletal muscle weights did not show any significant difference among the three diet groups, but mesenteric fat, liver, and kidney weights were significantly higher in the fish oil-fed rats than in the lard-fed rats. In soybean oil-fed rats, the levels of these parameters were intermediate of those of fish oil-fed and lard-fed rats.

### Serum energy metabolites

The serum biochemical characteristics after 4 weeks of dietary treatment are shown in Table 5. The serum glucose, FFA, triglyceride, and acetoacetic acid concentrations were not significantly different among the three diet groups, but  $\beta$ -hydroxybutyric acid concentrations were significantly higher in the fish oil-fed rats than in the lard-fed rats, suggesting an increase in  $\beta$ -oxidation in the livers of fish oil-fed rats.

**Table 4.** Growth performance and organ weights in rats fed each diet (g).

|                              | Soybean oil                | Fish oil                  | Lard                      |
|------------------------------|----------------------------|---------------------------|---------------------------|
| <b>Initial body weight</b>   | <b>286.8 ± 4.2</b>         | <b>286.5 ± 3.4</b>        | <b>286.0 ± 3.1</b>        |
| Final body weight            | 462.7 ± 12.5               | 475.8 ± 15.1              | 448.7 ± 12.0              |
| Body weight gain             | 175.9 ± 8.6                | 189.2 ± 12.7              | 162.7 ± 10.1              |
| Total food intake            | 684.9 ± 21.7               | 708.9 ± 31.4              | 695.1 ± 27.6              |
| Food efficiency <sup>†</sup> | 0.26 ± 0.01 <sup>ab</sup>  | 0.27 ± 0.01 <sup>a</sup>  | 0.23 ± 0.01 <sup>b</sup>  |
| EDL                          | 0.37 ± 0.01                | 0.36 ± 0.01               | 0.37 ± 0.01               |
| Soleus                       | 0.30 ± 0.02                | 0.31 ± 0.01               | 0.30 ± 0.01               |
| Gastrocnemius                | 4.31 ± 0.13                | 4.25 ± 0.17               | 4.27 ± 0.09               |
| Plantaris                    | 0.89 ± 0.05                | 0.88 ± 0.03               | 0.87 ± 0.03               |
| TA                           | 1.42 ± 0.04                | 1.42 ± 0.05               | 1.42 ± 0.02               |
| Epididymal fat               | 9.21 ± 0.28                | 7.81 ± 0.59               | 8.81 ± 0.82               |
| Perirenal fat                | 14.59 ± 1.34               | 11.96 ± 1.23              | 14.73 ± 1.40              |
| Mesenteric fat               | 9.03 ± 0.74 <sup>ab</sup>  | 10.97 ± 0.61 <sup>a</sup> | 8.29 ± 0.76 <sup>b</sup>  |
| Brown adipose tissue         | 1.02 ± 0.05                | 1.08 ± 0.05               | 0.88 ± 0.07               |
| Liver                        | 19.26 ± 1.25 <sup>ab</sup> | 21.62 ± 1.33 <sup>a</sup> | 17.11 ± 0.70 <sup>b</sup> |
| Kidneys                      | 3.13 ± 0.08 <sup>ab</sup>  | 3.46 ± 0.11 <sup>a</sup>  | 2.83 ± 0.14 <sup>b</sup>  |
| Heart                        | 1.25 ± 0.03                | 1.34 ± 0.03               | 1.41 ± 0.13               |

Values are means ± SE for 6 rats. Different superscripts indicate there is a significant difference between two groups ( $p < 0.05$ ).

EDL; extensor digitorum longus, TA; tibialis anterior.

<sup>†</sup>. food efficiency = body weight gain (g) / total food intake (g)

doi: 10.1371/journal.pone.0080152.t004

**Table 5.** Concentration of serum energy substrates in rats fed each diet.

|                                       | Soybean oil                  | Fish oil                    | Lard                       |
|---------------------------------------|------------------------------|-----------------------------|----------------------------|
| <b>Glucose, mg/dl</b>                 | <b>196.3 ± 22.4</b>          | <b>167.3 ± 13.7</b>         | <b>151.7 ± 10.8</b>        |
| FFA, mEq/l                            | 0.176 ± 0.029                | 0.204 ± 0.039               | 0.118 ± 0.025              |
| Triglyceride, mg/dl                   | 189.9 ± 34.6                 | 204.5 ± 38.7                | 146.2 ± 25.3               |
| Acetoacetic acid, $\mu$ M             | 3.611 ± 1.221                | 4.264 ± 1.768               | 2.864 ± 1.418              |
| $\beta$ -hydroxybutyric acid, $\mu$ M | 13.483 ± 3.875 <sup>ab</sup> | 19.135 ± 5.057 <sup>a</sup> | 4.313 ± 1.395 <sup>b</sup> |

Values are means ± SE for 6 rats. Different superscripts indicate there is a significant difference between two groups ( $p < 0.05$ ).

FFA; free fatty acids.

doi: 10.1371/journal.pone.0080152.t005

### MyHC isoform composition and transcripts in EDL and soleus muscle

MyHC isoform composition is a common index for determining overall skeletal muscle fiber type. Figure 1 illustrates the MyHC electrophoresis pattern in the EDL and soleus of rats from each dietary treatment and their densitometrically analyzed results, which indicate MyHC isoform protein composition. The composition of MyHC isoforms was obviously different between the EDL and soleus. The EDL was composed of mainly MyHC2B, 2X, and 2A, whereas the soleus was composed exclusively of MyHC1. The mean percentage of MyHC2X in the EDL of fish oil-fed rats was

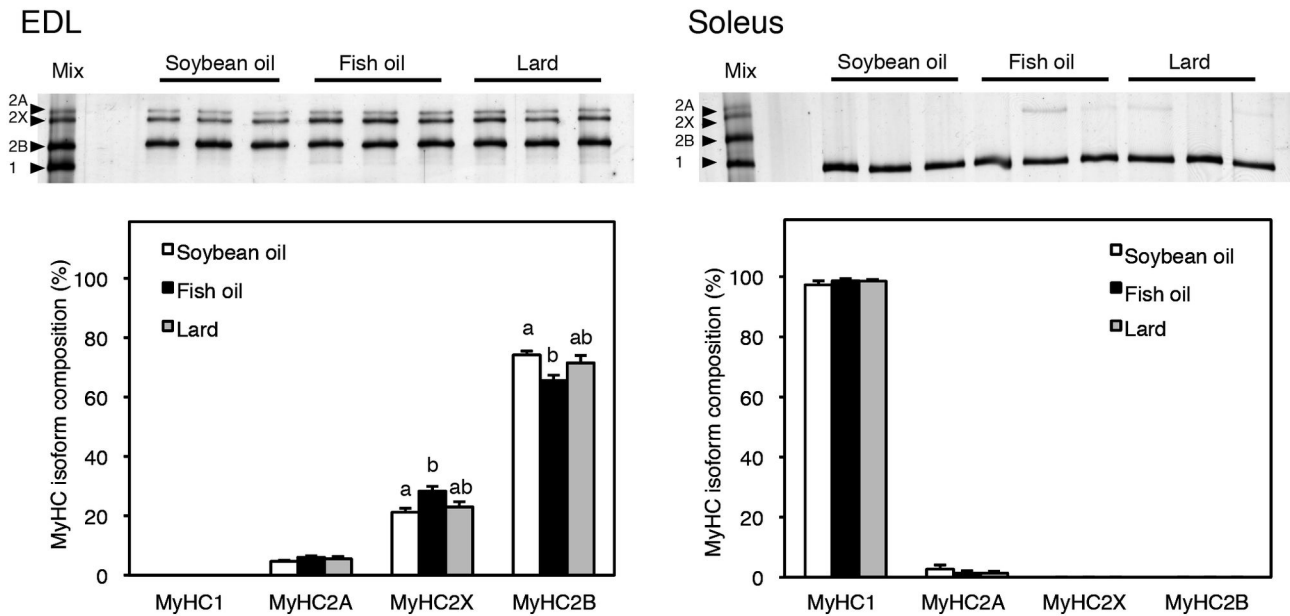

Figure 1 Mizunoya et al.

**Figure 1. Relative protein contents of myosin heavy chain isoforms (MyHC1, 2A, 2X, and 2B) in EDL and soleus muscles from soybean oil-fed (open bars), fish oil-fed (filled bars), and lard-fed (gray bars) rats.** The values are means  $\pm$  SE for six rats. The bands above the graphs represent the MyHC isoforms detected in silver-stained, high-resolution, 8% SDS-PAGE gels for three representative rats from each group. Relative MyHC2X and 2B isoform contents in the EDL differed significantly ( $p < 0.05$ ) between the soybean oil-fed and fish oil-fed rats. In the soleus, no significant differences were observed in MyHC isoform expression. A mix of rat EDL and soleus samples was used as the four MyHC isoform references (left lane). Different superscripts indicate a significant difference between two groups ( $p < 0.05$ , one-way ANOVA; post hoc: Tukey–Kramer multiple-comparison test).

doi: 10.1371/journal.pone.0080152.g001

significantly higher than that in the EDL of soybean oil-fed rats ( $27.2 \pm 2.1$  vs.  $21.2 \pm 1.3\%$ ,  $p < 0.05$ ), while MyHC2B was significantly lower ( $65.6 \pm 1.7$  vs.  $74.2 \pm 1.3\%$ ,  $p < 0.05$ ). In contrast to the EDL, there was no significant difference in the MyHC composition of the soleus among the dietary treatments. In contrast to the tissue weights and serum metabolites, the MyHC isoform composition values of the lard-fed rats were intermediate among the three treatment groups.

The mRNA levels of the respective MyHC isoforms normalized by  $\beta$ -actin largely corresponded to the protein composition patterns of the EDL and soleus, that is, MyHC2A, 2X, and 2B were higher in the EDL, and MyHC1 was higher in the soleus (Figure 2). Similar to the protein results, MyHC2X mRNA expression was significantly higher in fish oil-fed rats than in soybean oil-fed rats.

#### Transcript and protein levels of genes involved in metabolism, mitochondria, and transcription factors in EDL and soleus muscle

To further reveal the effect of the three dietary fats on skeletal muscle fiber type, transcript levels of genes related to (i) energy metabolism (myoglobin, LPL, UCP3, and PDK4); (ii) mitochondrial protein (porin, MTCO2, UCP3, and PDK4); and (iii) transcription factors (PPAR $\delta$ , FOXO1, MyoD and myogenin) and a coactivator (PGC1 $\alpha$ ) for muscle fiber type regulation were analyzed by quantitative RT-PCR. The expression of the transcripts of EDL and soleus is shown in Figure 3A and 4A respectively. In EDL muscle of fish oil-fed rats, the transcript levels of PDK4 and porin were significantly increased compared to soybean oil-fed and lard-fed rats, and the transcript level of UCP3 was significantly higher than that in

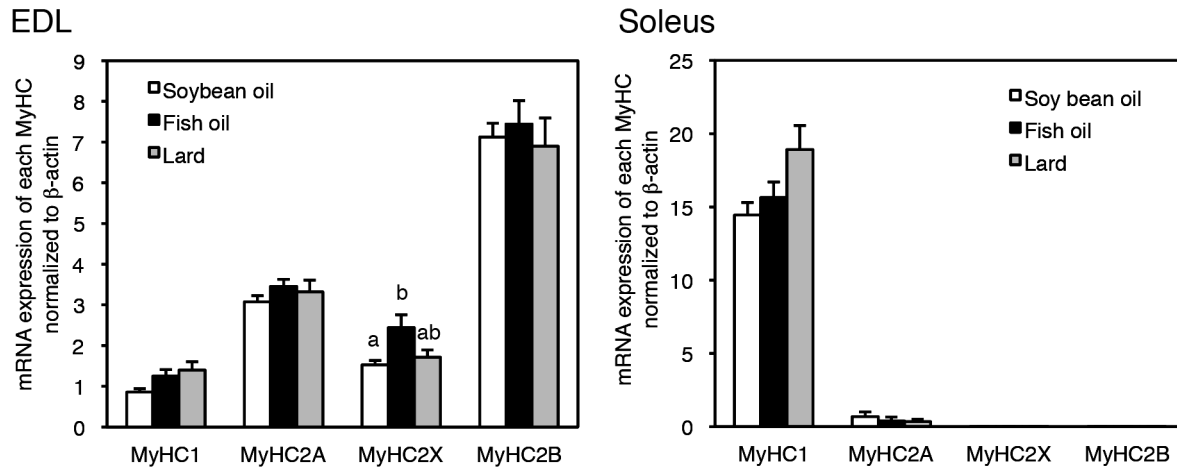

Figure 2 Mizunoya et al.

**Figure 2. Relative myosin heavy chain isoform (MyHC1, 2A, 2X, and 2B) mRNA expression in EDL and soleus muscles from soybean oil-fed (open bars), fish oil-fed (filled bars), and lard-fed (gray bars) rats.** Values are calculated based on the  $\Delta C_t$  method (where  $C_t$  is the threshold cycle) [25], using the following formula:  $2^{-(C_t(\text{target gene}) - C_t(\beta\text{-actin}))}$ , which gives the relative target gene expression compared to  $\beta$ -actin expression. The values are means  $\pm$  SE for six rats. Relative MyHC2X mRNA expression levels in the EDL differed significantly ( $p < 0.05$ ) between soybean oil-fed and fish oil-fed rats. Different superscripts indicate a significant difference between two groups ( $p < 0.05$ , one-way ANOVA; post hoc: Tukey–Kramer multiple-comparison test).

doi: 10.1371/journal.pone.0080152.g002

lard-fed rats but not significantly different than that in soybean oil-fed rats (Figure 3A). The dietary fat type did not alter the mRNA expression level of several transcription factors of muscle fiber type regulators in the EDL muscle.

The protein expression of myoglobin, UCP3, porin, PGC1 $\alpha$ , and FOXO1 in the EDL muscle was examined (Fig. 3BC). In fish oil-fed rats, the protein level of porin was significantly higher than that in soybean oil-fed rats, which corresponded to the transcript difference. In contrast to the transcript results, in fish oil-fed and lard-fed rats, the protein levels of PGC1 $\alpha$  and FOXO1 were significantly higher than those in soybean oil-fed rats, and the level of FOXO1 in lard-fed rats was significantly higher than that in fish oil-fed rats.

In soleus muscle of fish oil-fed rats, the transcript levels of myoglobin was significantly decreased compared to soybean oil-fed and lard-fed rats, and the transcript levels of porin and FOXO1 were significantly lower than that in lard-fed rats but not significantly different than that in soybean oil-fed rats (Figure 4A). The dietary fat type did not alter the mRNA expression level of transcription factors of muscle fiber type regulators except for FOXO1 in the soleus muscle.

The protein expression of myoglobin, UCP3, porin, PGC1 $\alpha$  and FOXO1 in the soleus muscle was also examined (Fig.

4BC). The level of myoglobin in fish oil-fed rats was significantly lower than that in soybean oil-fed rats, which corresponded to the transcript difference. However, the level of myoglobin in lard-fed rats was also significantly lower than that in soybean oil-fed rats, though there was no significant difference in the transcript level. In lard-fed rats, the protein level of porin was significantly higher than that in soybean oil-fed and fish oil-fed rats, which was similar to the transcript difference. In contrast to the transcript results, in fish oil-fed and lard-fed rats, the protein levels of PGC1 $\alpha$  was significantly lower than those in soybean oil-fed rats.

#### Composition of fatty acids in serum and muscle

To assess the delivery of fatty acids derived from the respective dietary fats to skeletal muscles, we examined the fatty acid composition of the total lipids in the serum and gastrocnemius (Figure 5). Significantly higher relative amounts of n-3 PUFA (EPA, DHA, and docosapentaenoic acid) were observed in both the sera and muscle of fish oil-fed rats. Furthermore, diminished amounts of linoleic acid (n-6 PUFA) and monounsaturated fatty acids, as well as reduced n-6/n-3 fatty acid ratios, were observed in the fish oil-fed rats. The

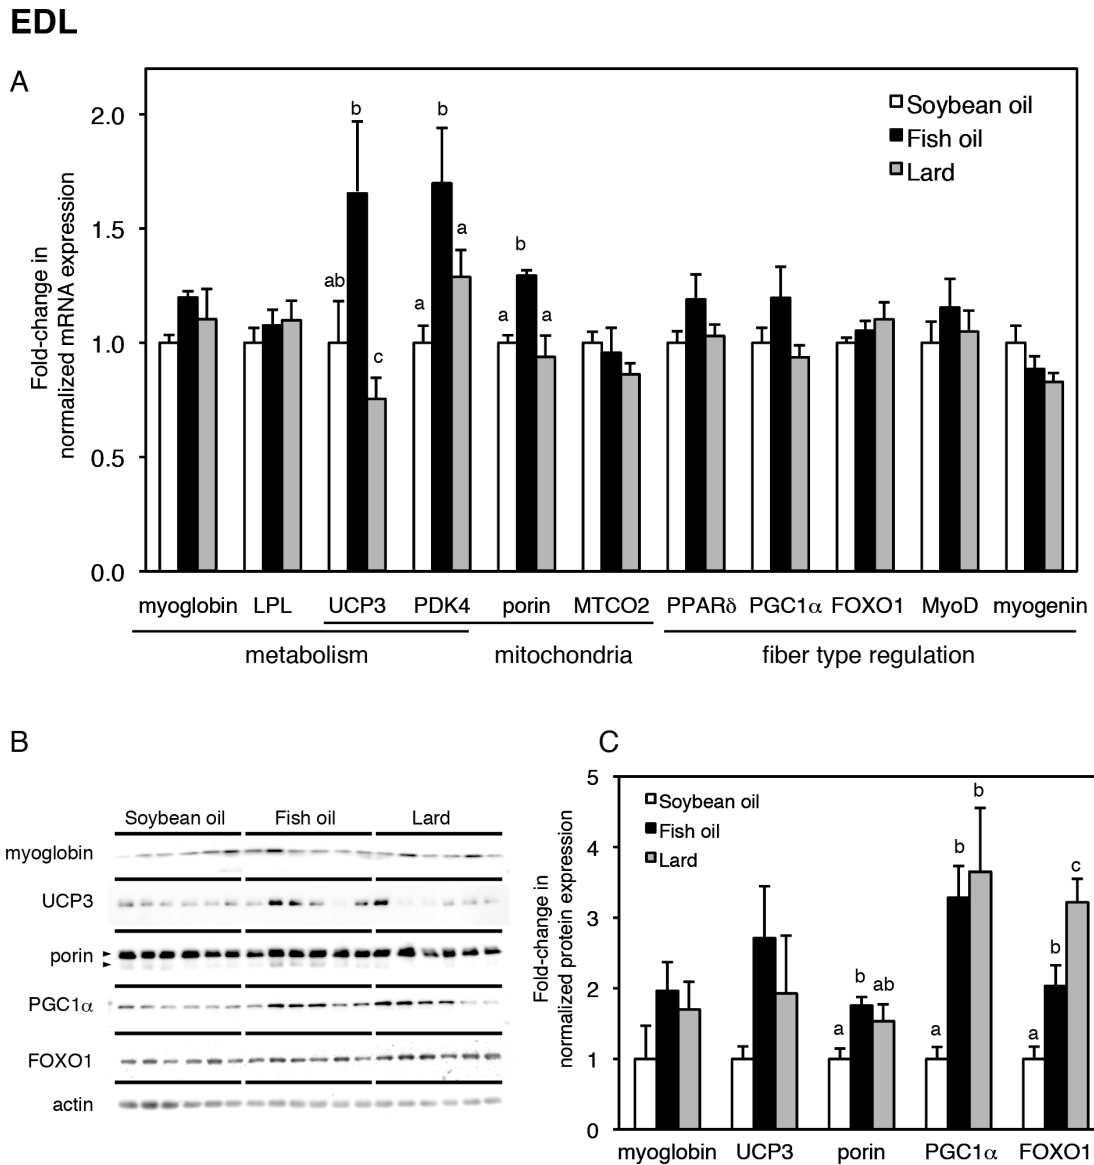

Figure 3 Mizunoya et al.

**Figure 3. Gene and protein expression in the EDL muscle (A–C).** (A) Relative expression levels of genes for energy metabolism (myoglobin, LPL, UCP3, PDK4), mitochondrial proteins (porin, MTCO2, UCP3 and PDK4), and transcription factors (PPARδ, FOXO1, MyoD, myogenin) and a coactivator (PGC1α) for muscle fiber type regulation in EDL muscles from soybean oil-fed (open bars), fish oil-fed (filled bars), and lard-fed (gray bars) rats. Each gene was normalized to β-actin mRNA. Values are expressed as fold changes compared with the soybean oil-fed group. (B) Protein expression levels of fiber type-related markers (myoglobin, UCP3, porin, PGC1α, and FOXO1) and loading control (actin) in the EDL, with densitometry quantification in panel C. The two arrowheads in porin indicate two porin species at 32 and 36 kDa [51], which were summed in panel C. The values are means ± SE for six rats. Different superscripts indicate a significant difference between two groups ( $p < 0.05$ , one-way ANOVA; post hoc: Tukey–Kramer multiple-comparison test).

doi: 10.1371/journal.pone.0080152.g003



**Soleus**

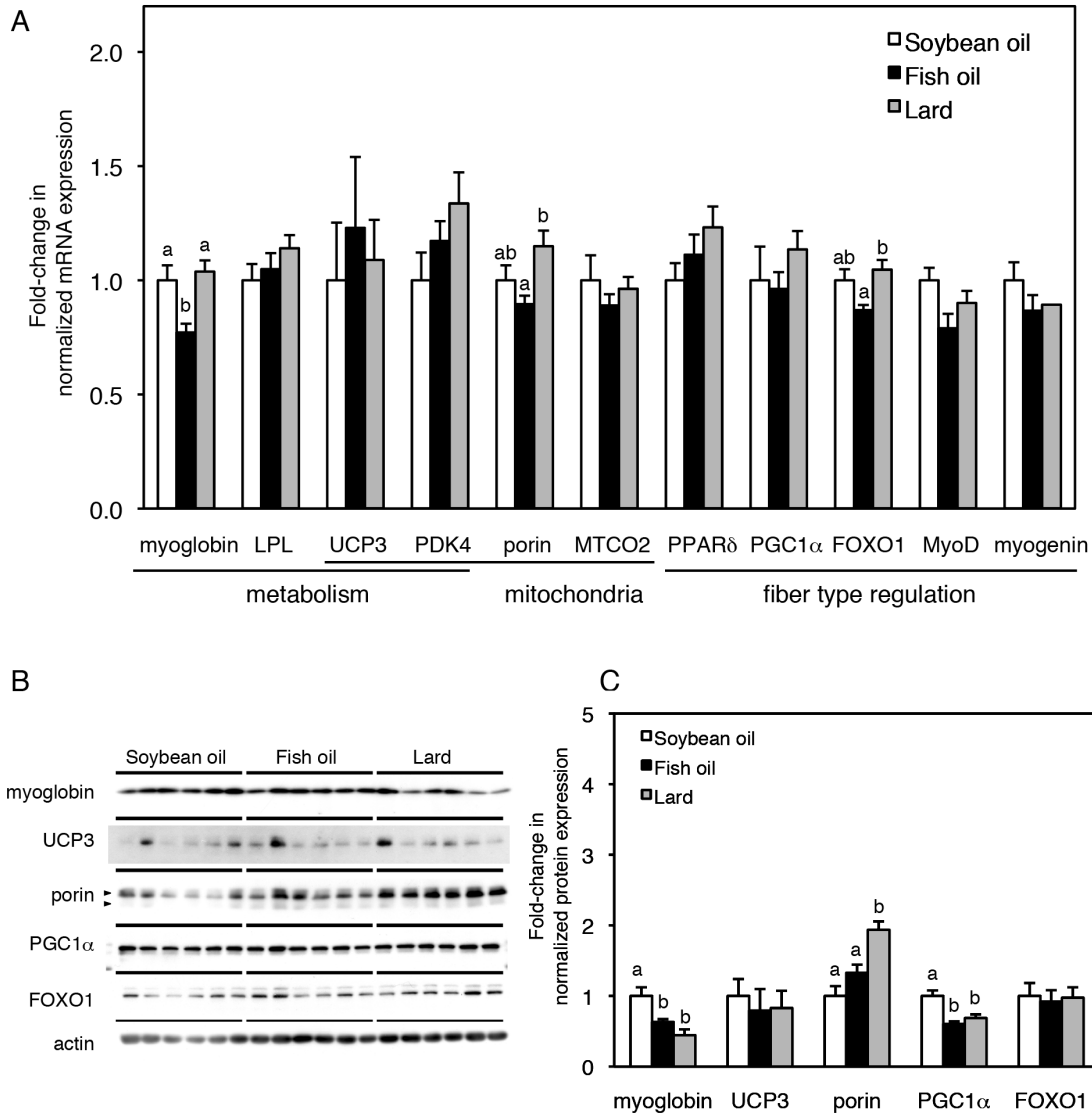

Figure 4 Mizunoya et al.

**Figure 4. Gene and protein expression in the soleus muscle (A–C).** (A) Relative expression levels of genes for energy metabolism (myoglobin, LPL, UCP3, PDK4), mitochondrial proteins (porin, MTCO2, UCP3 and PDK4), and transcription factors (PPARδ, FOXO1, MyoD, myogenin) and a coactivator (PGC1α) for muscle fiber type regulation in soleus muscles from soybean oil-fed (open bars), fish oil-fed (filled bars), and lard-fed (gray bars) rats. Each gene was normalized to β-actin mRNA. Values are expressed as fold changes compared with the soybean oil-fed group. (B) Protein expression levels of fiber type-related markers (myoglobin, UCP3, porin, PGC1α, and FOXO1) and loading control (actin) in the soleus, with densitometry quantification in panel C. The two arrowheads in porin indicate two porin species at 32 and 36 kDa [51], which were summed in panel C. The values are means ± SE for six rats. Different superscripts indicate a significant difference between two groups ( $p < 0.05$ , one-way ANOVA; post hoc: Tukey–Kramer multiple-comparison test).

doi: 10.1371/journal.pone.0080152.g004

n-6/n-3 ratios of lipids in muscles were  $2.94 \pm 0.22$ ,  $0.47 \pm 0.01$ , and  $2.03 \pm 0.11$  for the soybean oil-fed, fish oil-fed, and lard-fed groups, respectively. Significant differences were observed between the soybean oil-fed and fish oil-fed groups, between the fish oil-fed and lard-fed groups, and between the soybean oil-fed and lard-fed groups ( $p < 0.01$  by ANOVA and Tukey-Kramer test).

## Discussion

The present study was designed to examine the effects of different dietary fats derived from plants, animals, and fish—which show rather dissimilar fatty acid profiles—on the skeletal muscle fiber types. The contractile as well as metabolic properties of the skeletal muscle was analyzed with reference to the MyHC isoform composition—which is the most common protein marker used to delineate muscle fiber types—and that of the mRNA and protein levels of metabolism-related genes, in both slow-type dominant (soleus) and fast-type dominant (EDL) muscle tissues. Our study showed that the EDL muscle had a significantly higher MyHC2X and lower MyHC2B composition in the fish oil-fed rats compared to soybean oil-fed rats. The MyHC isoform composition of the lard-fed rats was intermediate between that of the fish oil-fed and soybean oil-fed rats. This alteration in the composition of the MyHC isoforms was accompanied by a significantly higher expression of MyHC2X mRNA in the fish oil-fed rats compared to soybean oil-fed rats. In agreement with this alteration of contractile genes, the mRNA and protein expression of some oxidative metabolism-related genes was increased in the fish oil-fed rats compared to soybean oil-fed rats. However, the effect of dietary fat on MyHC composition and expression of oxidative metabolism-related genes, in the soleus muscle was not in agreement with that observed in the EDL. Thus, our study indicates a dietary fat/fatty acid-dependent, differential regulation of contractile and metabolic properties between fast-type and slow-type muscles.

Many aspects of muscle metabolism are believed to correspond to MyHC isoform composition. The biological significance between type 2X and type 2B fibers has not been fully elucidated. However, a previous study reported that the activity of succinate dehydrogenase, a metabolic enzyme involved in the citric acid cycle, was higher in the intermediate type 2X fibers than in the fastest type 2B fibers [6]. In the present study, the increase in type 2X was concomitant with upregulation of oxidative metabolism-related factors in fish oil-fed rats. Overall, in the EDL muscle, fish oil intake induced higher expression of oxidative metabolism-related factors than soybean oil or lard intake, which are usually expressed at higher level in slow- or intermediate-type fibers. Significant increases in the mRNA expression of mitochondrial UCP3, PDK4, and porin were observed in the fish oil-fed rats compared with soybean oil or lard-fed rats. In other *in vitro* studies, similar results were observed, i.e. n-3 PUFA supplementation upregulated the expression of PDK4 [27] and UCP3 [28] in differentiated C2C12 myotubes. PDK4 expression in the skeletal muscle of mice fed n-3 PUFA concentrate has been reported [29]. Male C57BL/6N mice were fed a high-fat

diet containing 35% (w/w) fat (mainly corn oil) or a diet supplemented with n-3 PUFA concentrate (46% DHA, 14% EPA), which replaced 15% (w/w) of dietary fats for eight weeks. In the study, gastrocnemius muscle PDK4 expression was not affected by the dietary intake of n-3 PUFA. These results are contrary to those of the present study, which revealed significant PDK4 upregulation with fish oil intake (Figure 3A). At present, the causes of disagreement are unclear. However, it may be due to some differences in experimental conditions such as the animals, dietary fat levels, n-3 PUFA amounts, and experimental periods. It is also reported that DHA and EPA have different biological activities on lipid metabolism [18]. The fish oil used in our experiment contained a much higher EPA (20%) content than DHA content (8%). Thus, EPA, rather than DHA, may be primarily responsible for promoting PDK4 upregulation.

One possible biological pathway for the alterations of the expression of contractile and metabolic genes induced by dietary fat in the EDL muscle is the modulation of transcription factors such as PPAR $\delta$ . PPARs are ligand-dependent nuclear receptors that belong to the superfamily of nuclear transcription factors. PPAR $\delta$  is believed to be the key nuclear receptor for regulating muscle fiber type. Over-expression of constitutively active, muscle-specific VP16-PPAR $\delta$  was previously reported to enhance mitochondrial gene expression in association with a fiber type switch from fast glycolytic type 2 fibers to slow oxidative type 1 fibers [3]. Fatty acids are ubiquitous biological molecules that are used as metabolic fuels, covalent regulators of signaling molecules, and essential components of cellular membranes. Fatty acids are natural, endogenous ligands for PPARs, and they mediate adaptive metabolic responses to changes in systemic fuel availability [30–34]. Interestingly, PPAR affinity varies depending on the fatty acid species. For example, EPA is a much more potent activator of PPAR $\alpha$  in primary hepatocytes than arachidonic acid, an n-6 PUFA [35]. Using luciferase reporter assays, Forman et al. demonstrated that PUFAs such as linoleic acid, arachidonic acid, and EPA are much more potent activators of PPAR $\delta$  at a concentration of 30  $\mu$ M [31]; this level is physiologically relevant because mammalian serum free fatty acid concentrations can be greater than 100  $\mu$ M. Therefore, it is possible that EPA, which is abundant in the fish oil, could function as a PPAR $\delta$  agonist and affect the expression of contractile and metabolic genes in the skeletal muscles. However, it remains to be elucidated whether the PPAR $\delta$  functions are different between the EDL and the soleus.

A difference in drug reactivity between fast-type and slow-type muscles has also been observed in PPAR $\delta$  agonist (GW501516)-treated animals [36]. In that report, the authors described that in all their gene expression studies, the maximal effects of PPAR $\delta$  activation were predominantly detected in fast-twitch (quadriceps and gastrocnemius) and not slow-twitch (soleus) muscles. Cresser et al. showed that glycolytic fibers (white gastrocnemius) increased their capacity for oxidative metabolism more robustly than oxidative fibers (soleus and red gastrocnemius) in response to treatment with GW501516 [37]. In our results, the EDL showed a greater response to alterations of dietary fat in contractile and metabolic factors

Serum

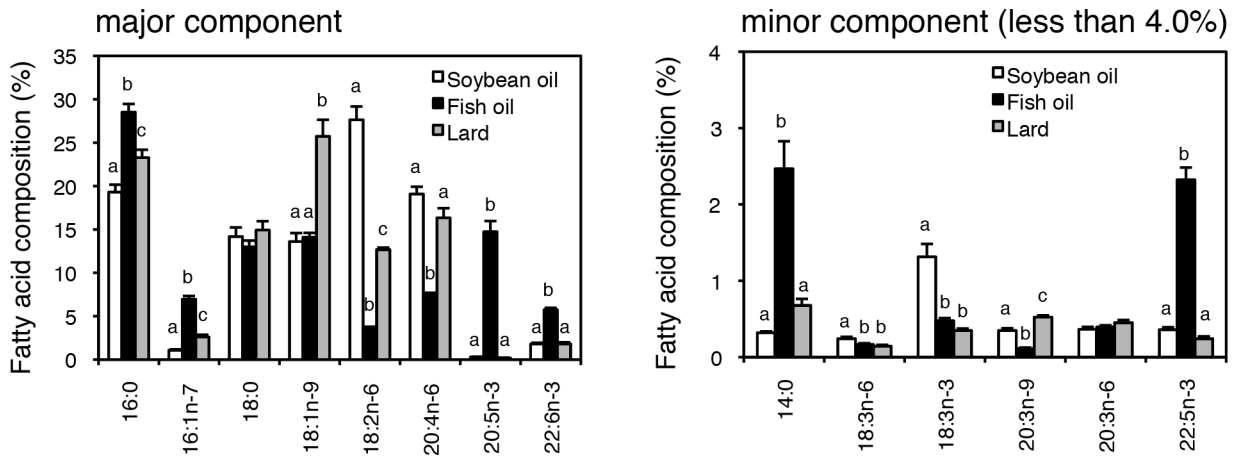

Muscle (gastrocnemius)

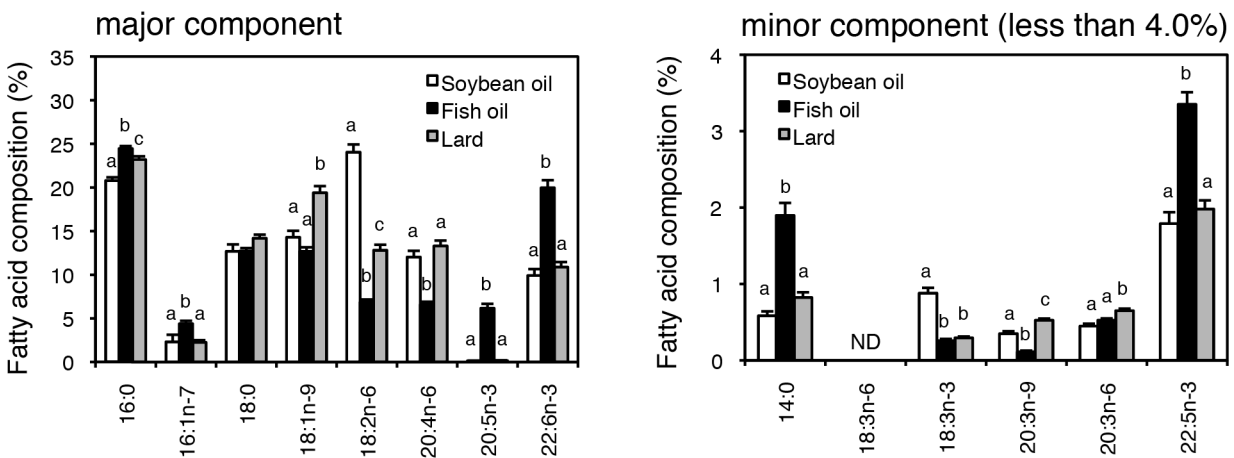

Figure 5 Mizunoya et al.

**Figure 5. Comparison of the distribution of fatty acids in the serum and gastrocnemius muscle (A–D).** (A) Major fatty acids (more than 4.0%) and (B) minor fatty acids (less than 4.0%) composing lipids in sera from soybean oil-fed (open bars), fish oil-fed (filled bars), and lard-fed (gray bars) rats. (C) Major fatty acids (more than 4.0%) and (D) minor fatty acids (less than 4.0%) composing lipids in gastrocnemius muscles from soybean oil-fed (open bars), fish oil-fed (filled bars), and lard-fed (gray bars) rats. The values are means  $\pm$  SE for six rats. Different superscripts indicate a significant difference between two groups ( $p < 0.05$ , one-way ANOVA; post hoc: Tukey–Kramer multiple-comparison test). 14:0, myristic acid; 16:0, palmitic acid; 16:1n-7, palmitoleic acid; 18:0, stearic acid; 18:1n-9, oleic acid; 18:2n-6, linoleic acid; 18:3n-6,  $\gamma$ -linolenic acid; 18:3n-3,  $\alpha$ -linolenic acid; 20:3n-9, mead acid; 20:3n-6, dihomo- $\gamma$ -linolenic acid; 20:4n-6, arachidonic acid; 20:5n-3, eicosapentaenoic acid (EPA); 22:5n-3, docosapentaenoic acid; 22:6n-3, docosahexaenoic acid (DHA); ND, not detected.

doi: 10.1371/journal.pone.0080152.g005

compared to the soleus muscle. Thus, it seems likely that activation or function of PPAR $\delta$  induced by fatty acids derived from dietary fat is more prominent in fast-type muscles such as EDL.

Fatty acids are transported throughout the body in esterified and nonesterified forms. Since fatty acids are bioactive substances, it is important to note that fatty acids from the diet could reach the target tissues. Indeed, the fatty acid composition of the muscles was reflected in part by the fatty acid composition of the diets, with high levels of EPA and DHA in the muscle of rats fed with fish oil diet, high levels of linoleic acid in the muscle of rats fed with soybean oil diet, and high levels of oleic acid in the muscle of rats fed with lard diet (Figure 5). Consistent with this observation, previous studies have reported that the fatty acid composition of muscle lipids is influenced by the type of dietary fat in the diet [38,39]. In one of these studies, the overall effects of the dietary fatty acids were similar in both soleus and EDL muscles [38].

PGC1 $\alpha$  is a transcriptional coactivator that was first discovered by Spiegelman's group [40] as a cold-inducible protein that binds to PPAR $\gamma$  and increases the expression of UCP1 in the brown fat of mice. Forced expression of PGC1 $\alpha$  in the skeletal muscle of transgenic mice triggers the formation of type 1 oxidative muscle fibers [41]. In our experiments, there was a greater increase in the PGC1 $\alpha$  protein in the EDL muscle in fish oil-fed and lard-fed rats than in soybean oil-fed rats. Although the slow MyHC1 composition did not increase in the EDL muscle, the increase of intermediate type 2X occurred in our experiments.

The level of FOXO1 protein was significantly increased in the fish oil-fed and lard-fed rats compared with soybean oil-fed rats. Recent evidence supports the involvement of the transcription factor FOXO1 in regulating the adaptive metabolism of muscle. FOXO1 recruits the fatty acid translocase CD36 to the plasma membrane, leading to increased fatty acid uptake and oxidation in C2C12 myogenic cells [42]. The reciprocal role of FOXO1 in muscle fiber type regulation must be noted here. Transgenic mice specifically over-expressing FOXO1 in skeletal muscle exhibit decreased expression of many genes related to the structural proteins of type 1 slow fibers [43]. By contrast, conditional ablation of FOXO1 expression in the soleus muscle leads to reduced slow fiber formation and increased fast fiber formation, a phenotype similar to that observed upon FOXO1 over-expression [44]. The mechanism through which FOXO1 plays a critical role in muscle fiber type regulation remains controversial.

Protein levels of PGC1 $\alpha$  and FOXO1 in EDL were increased in fish oil-fed and lard-fed rats compared to soybean oil-fed rats, however mRNA levels were not significantly upregulated. It is likely that these two proteins were post-translationally modified in response to dietary fat, though this was not directly assessed. Until now, cytokines and phosphorylation have been implicated in the control of PGC1 $\alpha$  degradation rates [45]. It has also been reported that acetylation is involved in the post-translational control of PGC1 $\alpha$  protein levels [46]. Additionally, it has been suggested that insulin signaling leads to FOXO1 polyubiquitination, resulting in downregulation via proteasome-dependent degradation [47]. FOXO1 is phosphorylated by

protein kinase B (PKB) in the insulin signaling pathway and consequently excluded from the nucleus. Phosphorylated FOXO1 is then ubiquitinated in the cytoplasm, followed by degradation through the 26S proteasome. Thus, if dietary fat/fatty acids affect signaling enzymes such as kinases, phosphorylases, acetylases, and deacetylases, protein levels of PGC1 $\alpha$  or FOXO1 could be altered independently from mRNA levels.

Surprisingly, although lard containing the abundant saturated fatty acids was expected to show the lowest oxidative phenotypes, the lard-fed rats showed intermediate phenotypes between fish oil- and soybean oil-fed rats in many results of the present study. This might be due to that high oleic acid content in lard. The 25-year follow-up study showed that the incidence of cardiovascular disease in middle-aged men from the Mediterranean area of Southern Europe was relatively lower than that expected in men with similar cholesterol concentration [48]. The traditional Mediterranean diet is characterized by a high consumption of olive oil, which is rich in monounsaturated fatty acids, mainly oleic acid. The low incidence of cardiovascular disease observed in these populations could be related to the beneficial effects of diets rich in oleic acid. In agreement with this notion, it is reported that the intake of oleic acid-rich diet improved the abnormal distribution of LDL and HDL in mildly obese normolipidemic women [49].

It is important to assume pre-feeding muscle fiber type prior to dietary intervention. Before the dietary intervention, rats were fed a commercial diet (CRF-1), where the fatty acid composition was similar to the soybean oil diet (approximately 50% linoleic acid and 24% oleic acid). Thus, initial conditions may have been similar to the soybean oil-fed group. Previously, we reported the effects of 48-h food deprivation on muscle fiber type properties [50]. In that study, rats of the same strain, age, breeder, and commercial diet (CRF-1) were used and MyHC composition of the control group was very similar to this experiment in both EDL and soleus muscle. Thus, it is assumed that the muscle fiber type was largely unaltered during the 4-week experimental period in this dietary fat intervention experiment.

In conclusion, the intake of different types of dietary fat showed an evident effect on rat skeletal muscle contractile and metabolic gene expressions in the EDL, a fast-type dominant muscle tissue. In particular, fish oil intake showed more oxidative characteristics than soybean oil intake. In contrast, the effect of dietary fat type on the soleus, a slow-type dominant muscle tissue, was less evident. Further studies are required to clarify the effects of different types of dietary fats on various muscle functions, and to unravel the mechanism underlying the action of slow-type and fast-type muscles.

## Acknowledgements

The authors are grateful for all the study participants.

## Author Contributions

Conceived and designed the experiments: WM. Performed the experiments: WM Y. Iwamoto FR YK BS. Analyzed the data:

WM Y. Iwamoto FR YK BS. Contributed reagents/materials/analysis tools: WM Y. Iwamoto FR YK BS. Wrote the

manuscript: WM. Interpreted results of experiments: WM Y. Iwamoto MS MN YS RT Y. Ikeuchi.

## References

- Zierath JR, Hawley JA (2004) Skeletal muscle fiber type: influence on contractile and metabolic properties. *PLoS Biol* 2: e348. doi:10.1371/journal.pbio.0020348. PubMed: 15486583.
- Schuler M, Ali F, Chambon C, Duteil D, Bornert JM et al. (2006) PGC1 $\alpha$  expression is controlled in skeletal muscles by PPAR $\beta$ , whose ablation results in fiber-type switching, obesity, and type 2 diabetes. *Cell Metab* 4: 407-414. doi:10.1016/j.cmet.2006.10.003. PubMed: 17084713.
- Wang YX, Zhang CL, Yu RT, Cho HK, Nelson MC et al. (2004) Regulation of muscle fiber type and running endurance by PPAR $\delta$ . *PLoS Biol* 2: e294. doi:10.1371/journal.pbio.0020294. PubMed: 15328533.
- Pette D, Staron RS (2000) Myosin isoforms, muscle fiber types, and transitions. *Microsc Res Tech* 50: 500-509. doi:10.1002/1097-0029(20000915)50:6. PubMed: 10998639.
- Rivero JL, Talmadge RJ, Edgerton VR (1998) Fibre size and metabolic properties of myosin heavy chain-based fibre types in rat skeletal muscle. *J Muscle Res Cell Motil* 19: 733-742. doi:10.1023/A:1005482816442. PubMed: 9836144.
- Rivero JL, Talmadge RJ, Edgerton VR (1999) Interrelationships of myofibrillar ATPase activity and metabolic properties of myosin heavy chain-based fibre types in rat skeletal muscle. *Histochem Cell Biol* 111: 277-287. doi:10.1007/s004180050358. PubMed: 10219627.
- Termin A, Staron RS, Pette D (1989) Myosin heavy chain isoforms in histochemically defined fiber types of rat muscle. *Histochemistry* 92: 453-457. doi:10.1007/BF00524756. PubMed: 2530196.
- Izumo S, Nadal-Ginard B, Mahdavi V (1986) All members of the MHC multigene family respond to thyroid hormone in a highly tissue-specific manner. *Science* 231: 597-600. doi:10.1126/science.3945800. PubMed: 3945800.
- Pette D (1998) Training effects on the contractile apparatus. *Acta Physiol Scand* 162: 367-376. doi:10.1046/j.1365-201X.1998.0296e.x. PubMed: 9578383.
- Talmadge RJ, Garcia ND, Roy RR, Edgerton VR (2004) Myosin heavy chain isoform mRNA and protein levels after long-term paralysis. *Biochem Biophys Res Commun* 325: 296-301. doi:10.1016/j.bbrc.2004.10.030. PubMed: 15522232.
- Sato Y, Shimizu M, Mizunoya W, Wariishi H, Tatsumi R et al. (2009) Differential expression of sarcolemmal and myofibrillar proteins of rat soleus muscle during denervation atrophy. *Biosci Biotechnol Biochem* 73: 1748-1756. doi:10.1271/bbb.90085. PubMed: 19661702.
- Salmons S, Sréter FA (1976) Significance of impulse activity in the transformation of skeletal muscle type. *Nature* 263: 30-34. doi:10.1038/263030a0. PubMed: 958462.
- Caiozzo VJ, Baker MJ, McCue SA, Baldwin KM (1997) Single-fiber and whole muscle analyses of MHC isoform plasticity: interaction between T3 and unloading. *Am J Physiol* 273: C944-C952. PubMed: 9316416.
- Yoshihara H, Wakamatsu J, Kawabata F, Mori S, Haruno A et al. (2006) Beef extract supplementation increases leg muscle mass and modifies skeletal muscle fiber types in rats. *J Nutr Sci Vitaminol (Tokyo)* 52: 183-193. doi:10.3177/jnsv.52.183. PubMed: 16967762.
- Fitzsimons DP, Diffie GM, Herrick RE, Baldwin KM (1990) Effects of endurance exercise on isomyosin patterns in fast- and slow-twitch skeletal muscles. *J Appl Physiol* 68: 1950-1955. PubMed: 2141832.
- Couet C, Delarue J, Ritz P, Antoine JM, Lamisse F (1997) Effect of dietary fish oil on body fat mass and basal fat oxidation in healthy adults. *Int J Obes Relat Metab Disord* 21: 637-643. doi:10.1038/sj.jco.0800451. PubMed: 15481762.
- Azain MJ (2004) Role of fatty acids in adipocyte growth and development. *J Anim Sci* 82: 916-924. PubMed: 15032450.
- Gotoh N, Nagao K, Onoda S, Shirouchi B, Furuya K et al. (2009) Effects of three different highly purified n-3 series highly unsaturated fatty acids on lipid metabolism in C57BL/KsJ-db/db mice. *J Agric Food Chem* 57: 11047-11054. doi:10.1021/jf9026553. PubMed: 19848389.
- Baillie RA, Takada R, Nakamura M, Clarke SD (1999) Coordinate induction of peroxisomal acyl-CoA oxidase and UCP-3 by dietary fish oil: a mechanism for decreased body fat deposition. *Prostaglandins Leukot Essent Fatty Acids* 60: 351-356. doi:10.1016/S0952-3278(99)80011-8. PubMed: 10471120.
- Oudart H, Groscolas R, Calgari C, Nibbelink M, Leray C et al. (1997) Brown fat thermogenesis in rats fed high-fat diets enriched with n-3 polyunsaturated fatty acids. *Int J Obes Relat Metab Disord* 21: 955-962. doi:10.1038/sj.jco.0800500. PubMed: 9368817.
- Takahashi Y, Ide T (2000) Dietary n-3 fatty acids affect mRNA level of brown adipose tissue uncoupling protein 1, and white adipose tissue leptin and glucose transporter 4 in the rat. *Br J Nutr* 84: 175-184. PubMed: 11029968.
- Hegsted DM, McGandy RB, Myers ML, Stare FJ (1965) Quantitative effects of dietary fat on serum cholesterol in man. *Am J Clin Nutr* 17: 281-295. PubMed: 5846902.
- Patterson E, Wall R, Fitzgerald GF, Ross RP, Stanton C (2012) Health implications of high dietary omega-6 polyunsaturated fatty acids. *J Nutr Metab* 2012: 539426. PubMed: 22570770
- Mizunoya W, Wakamatsu J, Tatsumi R, Ikeuchi Y (2008) Protocol for high-resolution separation of rodent myosin heavy chain isoforms in a mini-gel electrophoresis system. *Anal Biochem* 377: 111-113. doi:10.1016/j.ab.2008.02.021. PubMed: 18358820.
- Pfaffl MW (2001) A new mathematical model for relative quantification in real-time RT-PCR. *Nucleic Acids Res* 29: e45. doi:10.1093/nar/29.9.e45. PubMed: 11328886.
- Folch J, Lees M, Sloane Stanley GH (1957) A simple method for the isolation and purification of total lipides from animal tissues. *J Biol Chem* 226: 497-509. PubMed: 13428781.
- Zhang J, Piao X, Li D (2012) Effect of n-3 polyunsaturated fatty acids on induction of hypoxia inducible factor-2  $\alpha$  in C2C12 myotubes. *J Anim Vet Adv* 11: 1411-1419. doi:10.3923/javaa.2012.1411.1419.
- Lee MS, Kim IH, Kim Y (2013) Effects of eicosapentaenoic acid and docosahexaenoic acid on uncoupling protein 3 gene expression in C2C12 muscle cells. *Nutrients* 5: 1660-1671. doi:10.3390/nu5051660. PubMed: 23698161.
- Horakova O, Medrikova D, van Schothorst EM, Bunschoten A, Flachs P et al. (2012) Preservation of metabolic flexibility in skeletal muscle by a combined use of n-3 PUFA and rosiglitazone in dietary obese mice. *PLOS ONE* 7: e43764. doi:10.1371/journal.pone.0043764. PubMed: 22952760.
- Forman BM, Chen J, Evans RM (1996) The peroxisome proliferator-activated receptors: ligands and activators. *Ann N Y Acad Sci* 804: 266-275. doi:10.1111/j.1749-6632.1996.tb18621.x. PubMed: 8993549.
- Forman BM, Chen J, Evans RM (1997) Hypolipidemic drugs, polyunsaturated fatty acids, and eicosanoids are ligands for peroxisome proliferator-activated receptors  $\alpha$  and  $\delta$ . *Proc Natl Acad Sci U S A* 94: 4312-4317. doi:10.1073/pnas.94.9.4312. PubMed: 9113986.
- Fyffe SA, Alpey MS, Buetow L, Smith TK, Ferguson MA et al. (2006) Recombinant human PPAR- $\beta$ / $\delta$  ligand-binding domain is locked in an activated conformation by endogenous fatty acids. *J Mol Biol* 356: 1005-1013. doi:10.1016/j.jmb.2005.12.047. PubMed: 16405912.
- Kliwer SA, Xu HE, Lambert MH, Willson TM (2001) Peroxisome proliferator-activated receptors: from genes to physiology. *Recent Prog Horm Res* 56: 239-263. doi:10.1210/rp.56.1.239. PubMed: 11237216.
- Xu HE, Lambert MH, Montana VG, Parks DJ, Blanchard SG et al. (1999) Molecular recognition of fatty acids by peroxisome proliferator-activated receptors. *Mol Cell* 3: 397-403. doi:10.1016/S1097-2765(00)80467-0. PubMed: 10198642.
- Ren B, Thelen AP, Peters JM, Gonzalez FJ, Jump DB (1997) Polyunsaturated fatty acid suppression of hepatic fatty acid synthase and S14 gene expression does not require peroxisome proliferator-activated receptor  $\alpha$ . *J Biol Chem* 272: 26827-26832. doi:10.1074/jbc.272.43.26827. PubMed: 9341113.
- Narkar VA, Downes M, Yu RT, Emblar E, Wang YX et al. (2008) AMPK and PPAR $\delta$  agonists are exercise mimetics. *Cell* 134: 405-415. doi:10.1016/j.cell.2008.06.051. PubMed: 18674809.
- Cresser J, Bonen A, Chabowski A, Stefanyk LE, Gulli R et al. (2010) Oral administration of a PPAR- $\delta$  agonist to rodents worsens, not improves, maximal insulin-stimulated glucose transport in skeletal muscle of different fibers. *Am J Physiol Regul Integr Comp Physiol* 299: R470-R479. doi:10.1152/ajpregu.00431.2009. PubMed: 20538899.
- Ayre KJ, Hulbert AJ (1996) Dietary fatty acid profile influences the composition of skeletal muscle phospholipids in rats. *J Nutr* 126: 653-662. PubMed: 8598550.
- Zhou AL, Hintze KJ, Jimenez-Flores R, Ward RE (2012) Dietary fat composition influences tissue lipid profile and gene expression in

- Fischer-344 rats. *Lipids* 47: 1119-1130. doi:10.1007/s11745-012-3729-3. PubMed: 23086552.
40. Puigserver P, Wu Z, Park CW, Graves R, Wright M et al. (1998) A cold-inducible coactivator of nuclear receptors linked to adaptive thermogenesis. *Cell* 92: 829-839. doi:10.1016/S0092-8674(00)81410-5. PubMed: 9529258.
  41. Lin J, Wu H, Tarr PT, Zhang CY, Wu Z et al. (2002) Transcriptional coactivator PGC-1 alpha drives the formation of slow-twitch muscle fibres. *Nature* 418: 797-801. doi:10.1038/nature00904. PubMed: 12181572.
  42. Nahlé Z, Hsieh M, Pietka T, Coburn CT, Grimaldi PA et al. (2008) CD36-dependent regulation of muscle FoxO1 and PDK4 in the PPAR delta/beta-mediated adaptation to metabolic stress. *J Biol Chem* 283: 14317-14326. doi:10.1074/jbc.M706478200. PubMed: 18308721.
  43. Kamei Y, Miura S, Suzuki M, Kai Y, Mizukami J et al. (2004) Skeletal muscle FOXO1 (FKHR) transgenic mice have less skeletal muscle mass, down-regulated Type I (slow twitch/red muscle) fiber genes, and impaired glycemic control. *J Biol Chem* 279: 41114-41123. doi:10.1074/jbc.M400674200. PubMed: 15272020.
  44. Kitamura T, Kitamura YI, Funahashi Y, Shawber CJ, Castrillon DH et al. (2007) A Foxo/Notch pathway controls myogenic differentiation and fiber type specification. *J Clin Invest* 117: 2477-2485. doi:10.1172/JCI32054. PubMed: 17717603.
  45. Puigserver P, Rhee J, Lin J, Wu Z, Yoon JC et al. (2001) Cytokine stimulation of energy expenditure through p38 MAP kinase activation of PPARgamma coactivator-1. *Mol Cell* 8: 971-982. doi:10.1016/S1097-2765(01)00390-2. PubMed: 11741533.
  46. Dominy JE Jr., Lee Y, Gerhart-Hines Z, Puigserver P (2010) Nutrient-dependent regulation of PGC-1alpha's acetylation state and metabolic function through the enzymatic activities of Sirt1/GCN5. *Biochim Biophys Acta* 1804: 1676-1683. doi:10.1016/j.bbapap.2009.11.023. PubMed: 20005308.
  47. Matsuzaki H, Daitoku H, Hatta M, Tanaka K, Fukamizu A (2003) Insulin-induced phosphorylation of FKHR (Foxo1) targets to proteasomal degradation. *Proc Natl Acad Sci U S A* 100: 11285-11290. doi:10.1073/pnas.1934283100. PubMed: 13679577.
  48. Verschuren WM, Jacobs DR, Bloemberg BP, Kromhout D, Menotti A et al. (1995) Serum total cholesterol and long-term coronary heart disease mortality in different cultures. Twenty-five-year follow-up of the seven countries study. *JAMA* 274: 131-136. doi:10.1001/jama.274.2.131. PubMed: 7596000.
  49. Zambon A, Sartore G, Passera D, Francini-Pesenti F, Bassi A et al. (1999) Effects of hypocaloric dietary treatment enriched in oleic acid on LDL and HDL subclass distribution in mildly obese women. *J Intern Med* 246: 191-201. doi:10.1046/j.1365-2796.1999.00550.x. PubMed: 10447788.
  50. Mizunoya W, Sawano S, Iwamoto Y, Sato Y, Tatsumi R et al. (2013) Effect of 48-h food deprivation on the expression of myosin heavy-chain isoforms and fiber type-related factors in rats. *J Nutr Sci Vitaminol (Tokyo)* 59: 289-298. doi:10.3177/jnsv.59.289.
  51. Ha H, Hajek P, Bedwell DM, Burrows PD (1993) A mitochondrial porin cDNA predicts the existence of multiple human porins. *J Biol Chem* 268: 12143-12149. PubMed: 7685033.
